# Supplementary material
Source: Springer Nature journal article supplement (https://www.springermedizin.de/resource/supplementary/12936_2011_1838_MOESM3_ESM.pdf/9541896)

## A. 1997–2000

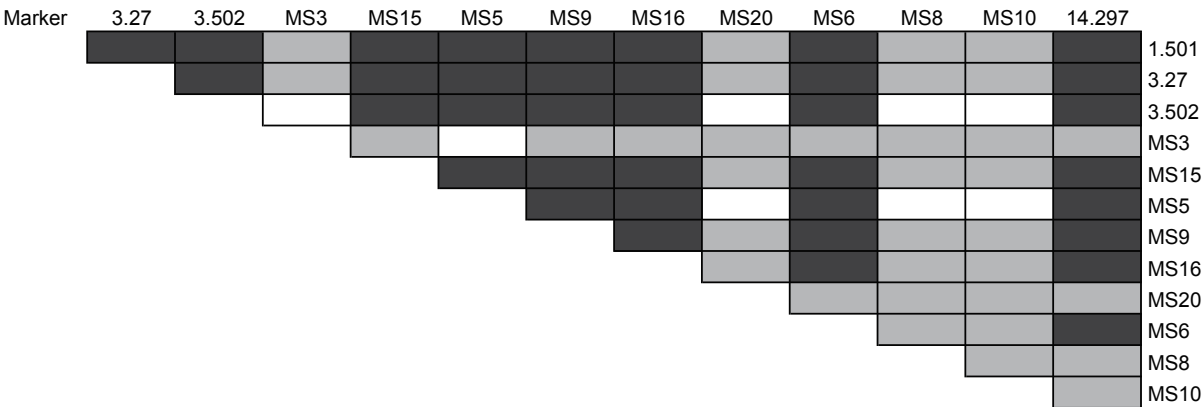

## B. 2007

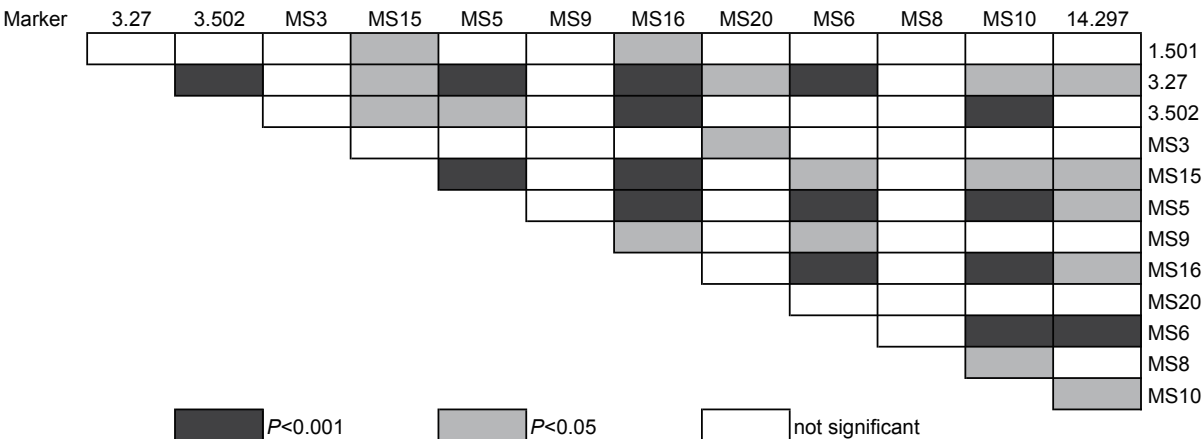

Supplement: MOESM3 [file 9541896]
